# Supplementary material for: Sea ice loss translates into major shifts in the carbonate environmental conditions in Arctic Shelf Sea
Source: Copernicus journal article supplement (doi:10.5194/egusphere-2023-1386), 2023-07-11
Supplement: Supplementary file 1 [file egusphere-2023-1386-supplement.pdf]

1

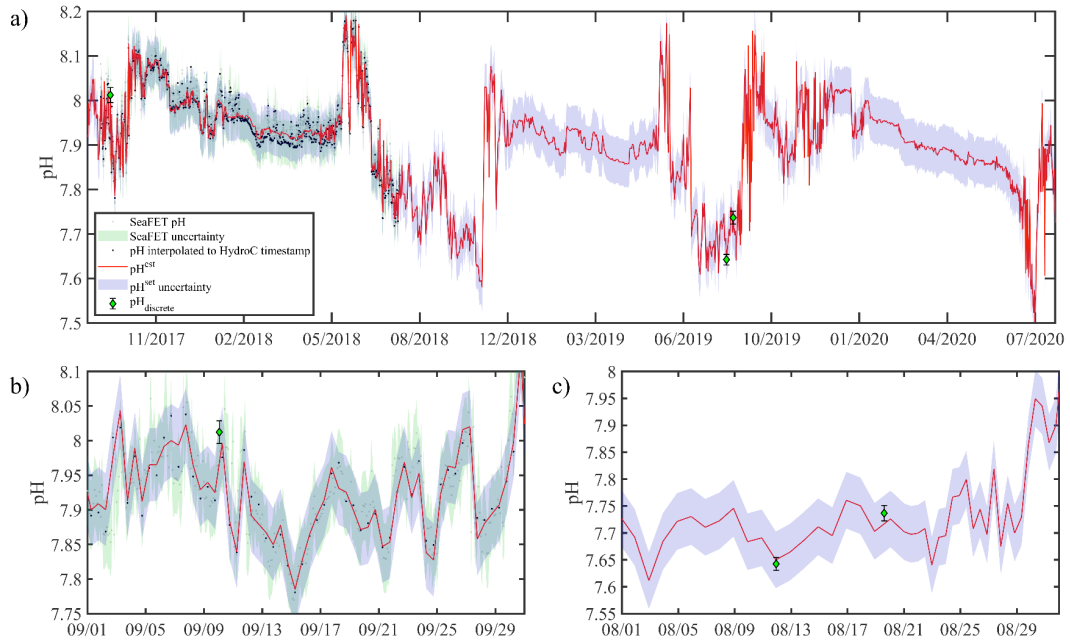

2

3 **Figure S1. Time series of pH with uncertainty estimates.** (a) Time series of  $\text{pH}^{\text{est}}$  (red line),

4  $\text{pH}_{\text{SeaFET}}$  (SeaFET timestamp gray dots, interpolated to HydroC timestamp black dots), and

5  $\text{pH}^{\text{disc}}_{\text{calc}}$  (green faced diamonds). pH uncertainty shown as green shading ( $\text{pH}_{\text{SeaFET}}$ ), blue

6 shading ( $\text{pH}^{\text{est}}$ ), and as error bars ( $\text{pH}^{\text{disc}}_{\text{calc}}$ ). (b) Zoomed in section to highlight  $\text{pH}^{\text{disc}}_{\text{calc}} \pm u_c$

7 used as reference (01/09/2017 - 01/10/2017; Cross et al., 2020a). (c) Zoomed in section to

8 highlight  $\text{pH}^{\text{disc}}_{\text{calc}} \pm u_c$  used as references (01/08/2019 – 01/09/2019; Cross et al., 2021).

9

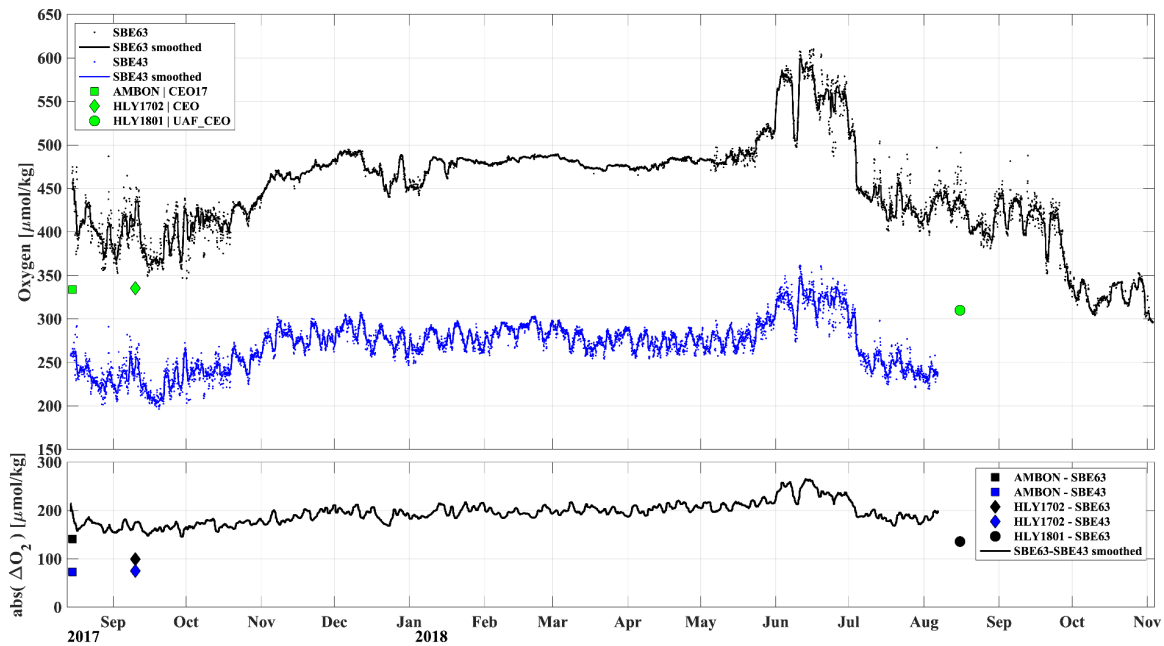

11

12

13 **Figure S2. Evaluation of oxygen data.** Top axes shows timeseries of oxygen from a) post-  
 14 calibration corrected and pumped SBE63 from 2017-2018 and 2018-2019 deployments (2 h  
 15 resolution black dots, 36 hour moving mean smoothed black line), unpumped SBE43 from 2017-  
 16 2018 deployment (2 h resolution blue dots, 36 hour moving mean smoothed blue line), and  
 17 oxygen interpolated to moored sensor depth from AMBON 2017 cruise (green square;  
 18 Danielson, 2021), HLY1702 cruise (green diamond; Cross et al., 2020a), and HLY1801 cruise  
 19 (green circle; McRaven and Pickart, 2021). Bottom axes show absolute differences in oxygen  
 20 between discrete or cast oxygen interpolated to moored sensor depth (AMBON = square,  
 21 HLY1702=diamond, HLY1801=circle), and absolute difference between smoothed moored  
 22 sensors (black line).

23

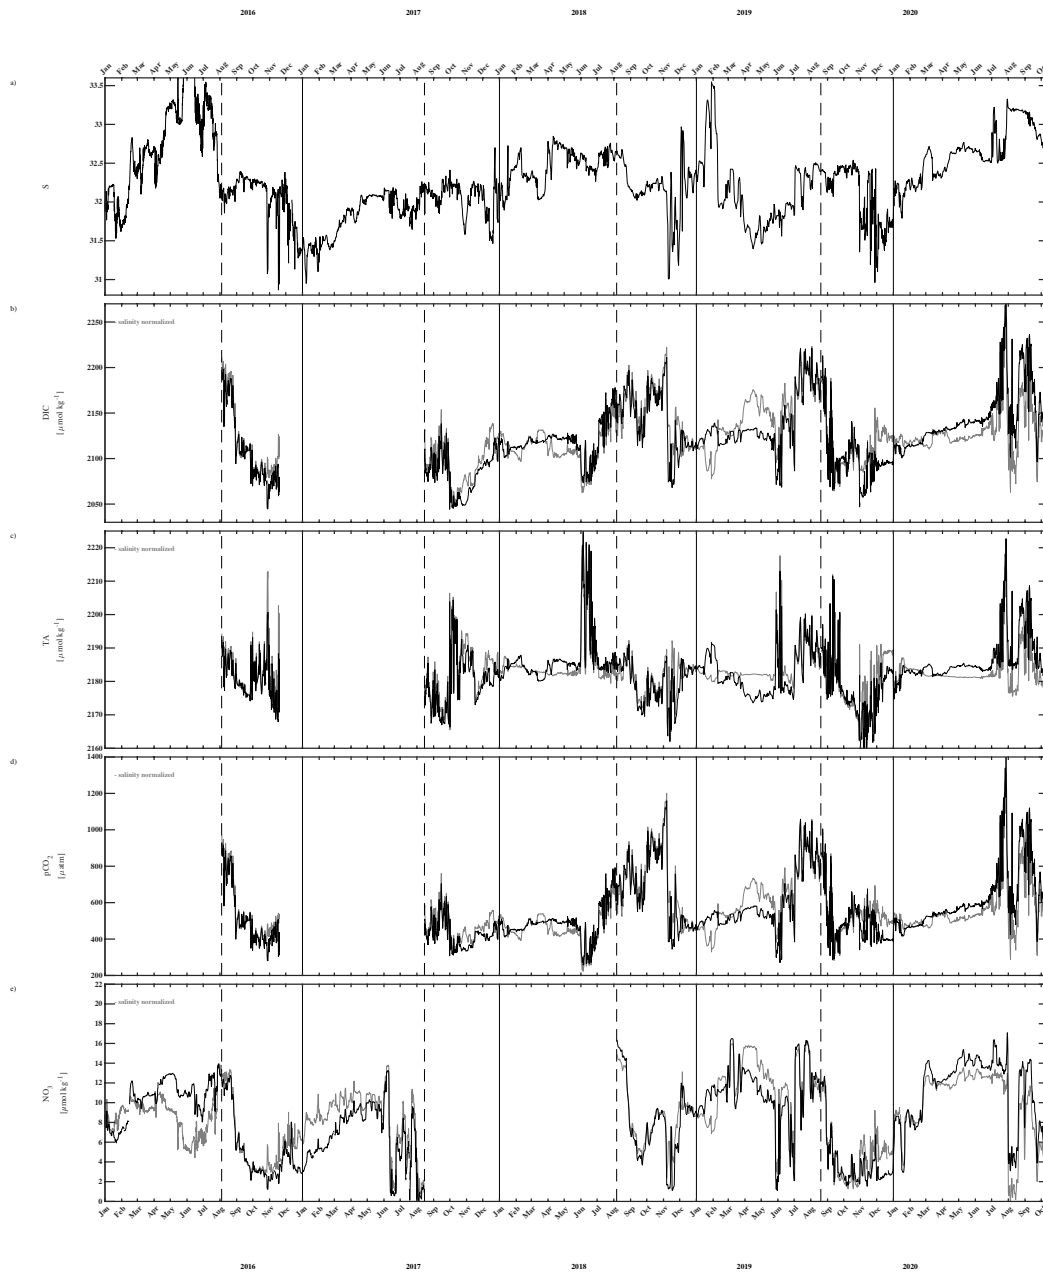

25

26 **Figure S3. Salinity normalization.** Timeseries of (a) salinity, (b) dissolved inorganic carbon  
 27 (DIC,  $\text{umol kg}^{-1}$ ), (c) total alkalinity (TA,  $\text{umol kg}^{-1}$ ), (d)  $p\text{CO}_2$  (uatm), and (e)  $\text{NO}_3$  ( $\text{umol kg}^{-1}$ ).  
 28 Salinity normalized (Friis, 2003) parameters are shown in gray.

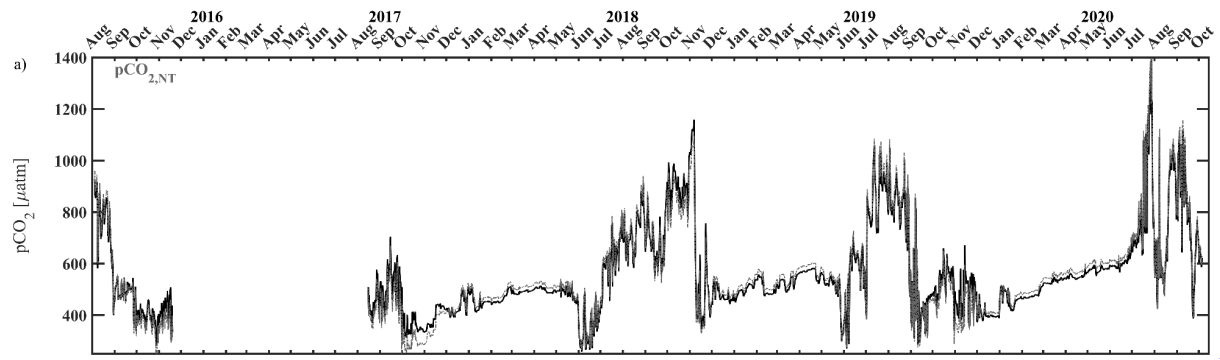

29

30 **Figure S4. Temperature normalization.** Timeseries of (a)  $p\text{CO}_2$  (black,  $\mu\text{atm}$ ) and temperature  
 31 normalized  $p\text{CO}_2$  (gray,  $p\text{CO}_{2,\text{NT}}$ ).

32

33

34

35

36
